# Supplementary material for: Functional Representation of Enzymes by Specific Peptides
Source: PLOS journal article supplement (doi:10.1371/journal.pcbi.0030167), 2007-08-22
Supplement: S3 (10.1371/journal.pcbi.0030167.s003) [file journal.pcbi.0030167.s003]

**Table S3: Numbers of enzymes in Swiss-Prot release 48.3 and Swiss-Prot release 45.**

| **EC class** | **R45 ∩ R48** | **R48 ∩ not in R45** | **R45 ∩ not in R48** |
| --- | --- | --- | --- |
| **Oxidoreductases** | 7776 | 1661 | 142 |
| **Transferases** | 12474 | 3722 | 333 |
| **Hydrolases** | 8728 | 2173 | 254 |
| **Lyases** | 4140 | 1089 | 492 |
| **Isomerases** | 2348 | 541 | 33 |
| **Ligases** | 4649 | 1399 | 43 |
| **Total** | **40115** | **10585** | **1297** |
